# Supplementary material
Source: PubMed Central journal article supplement (PMC6494702)
Supplement: NIHMS1017773-supplement-Supplement.pdf [file NIHMS1017773-supplement-Supplement.pdf]

## **Supplemental Material**

**Supplemental Table 1.** Test Characteristics of Ankle Pressure Indices for Identifying Stenoses >75% and >50% in Any Limb and Segment in 54 Subjects with Diabetes.

|                                           | <b>Sensitivity<br/>(95% CI)</b> | <b>Specificity<br/>(95% CI)</b> | <b>Positive<br/>Predictive Value<br/>(95% CI)</b> | <b>Negative<br/>Predictive Value<br/>(95% CI)</b> | <b>Accuracy<br/>(95% CI)</b> |
|-------------------------------------------|---------------------------------|---------------------------------|---------------------------------------------------|---------------------------------------------------|------------------------------|
| <b>Identifying Stenosis &gt; 75%</b>      |                                 |                                 |                                                   |                                                   |                              |
| Resting ABI < 0.90                        | 60%<br>(43%, 74%)               | 83%<br>(52%, 98%)               | 93%<br>(76%, 99%)                                 | 37%<br>(19%, 58%)                                 | 65%<br>(51%, 77%)            |
| Exercise ABI < 0.90                       | 91%<br>(77%, 97%)               | 50%<br>(21%, 79%)               | 86%<br>(73%, 95%)                                 | 60%<br>(26%, 88%)                                 | 81%<br>(69%, 91%)            |
| Exercise Ankle Pressure Decrease > 30mmHg | 7%<br>(2%, 20%)                 | 100%<br>(74%, 100%)             | 100%<br>(29%, 100%)                               | 24%<br>(13%, 38%)                                 | 28%<br>(17%, 42%)            |
| Exercise ABI > 20% Decrease               | 71%<br>(55%, 84%)               | 58%<br>(28%, 85%)               | 86%<br>(70%, 95%)                                 | 37%<br>(16%, 62%)                                 | 69%<br>(54%, 80%)            |
| <b>Identifying Stenosis &gt; 50%</b>      |                                 |                                 |                                                   |                                                   |                              |
| Resting ABI < 0.90                        | 57%<br>(42%, 72%)               | 100%<br>(59%, 100%)             | 100%<br>(87%, 100%)                               | 26%<br>(11%, 46%)                                 | 63%<br>(49%, 76%)            |
| Exercise ABI < 0.90                       | 89%<br>(77%, 97%)               | 71%<br>(29%, 96%)               | 96%<br>(85%, 99%)                                 | 50%<br>(19%, 81%)                                 | 87%<br>(75%, 95%)            |
| Exercise Ankle Pressure Decrease > 30mmHg | 7%<br>(1%, 18%)                 | 100%<br>(59%, 100%)             | 100%<br>(29%, 100%)                               | 14%<br>(6%, 27%)                                  | 19%<br>(9%, 32%)             |
| Exercise ABI > 20% Decrease               | 68%<br>(53%, 81%)               | 57%<br>(18%, 90%)               | 91%<br>(77%, 98%)                                 | 21%<br>(6%, 46%)                                  | 67%<br>(53%, 79%)            |

ABI = ankle-brachial index

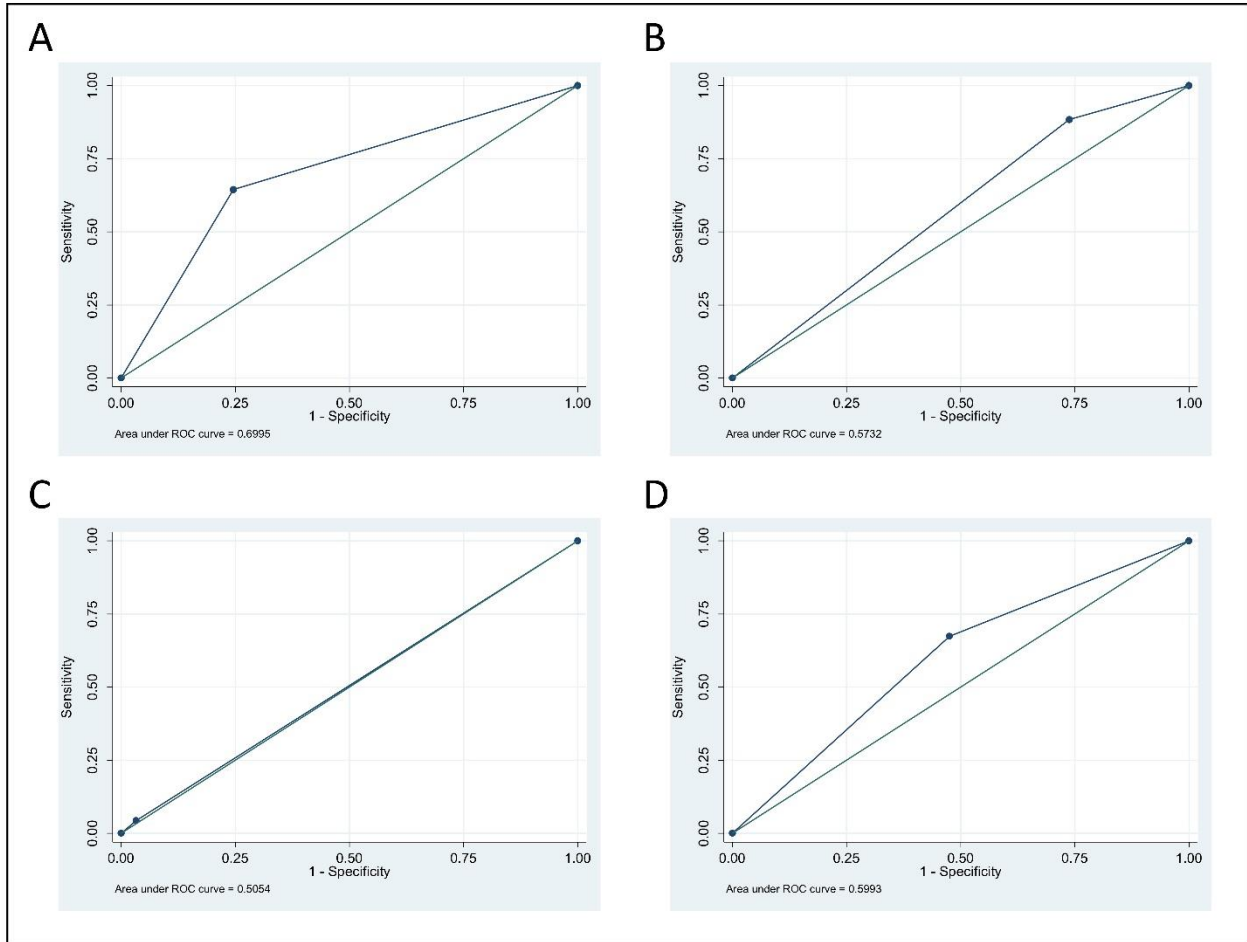

**Supplemental Figure 1. ROC Analysis in All Subjects for Stenoses > 75%**

- A.** Resting ABI < 0.90
- B.** Exercise ABI < 0.90
- C.** Exercise Ankle Pressure Decrease > 30mmHg
- D.** Exercise ABI > 20% Decrease

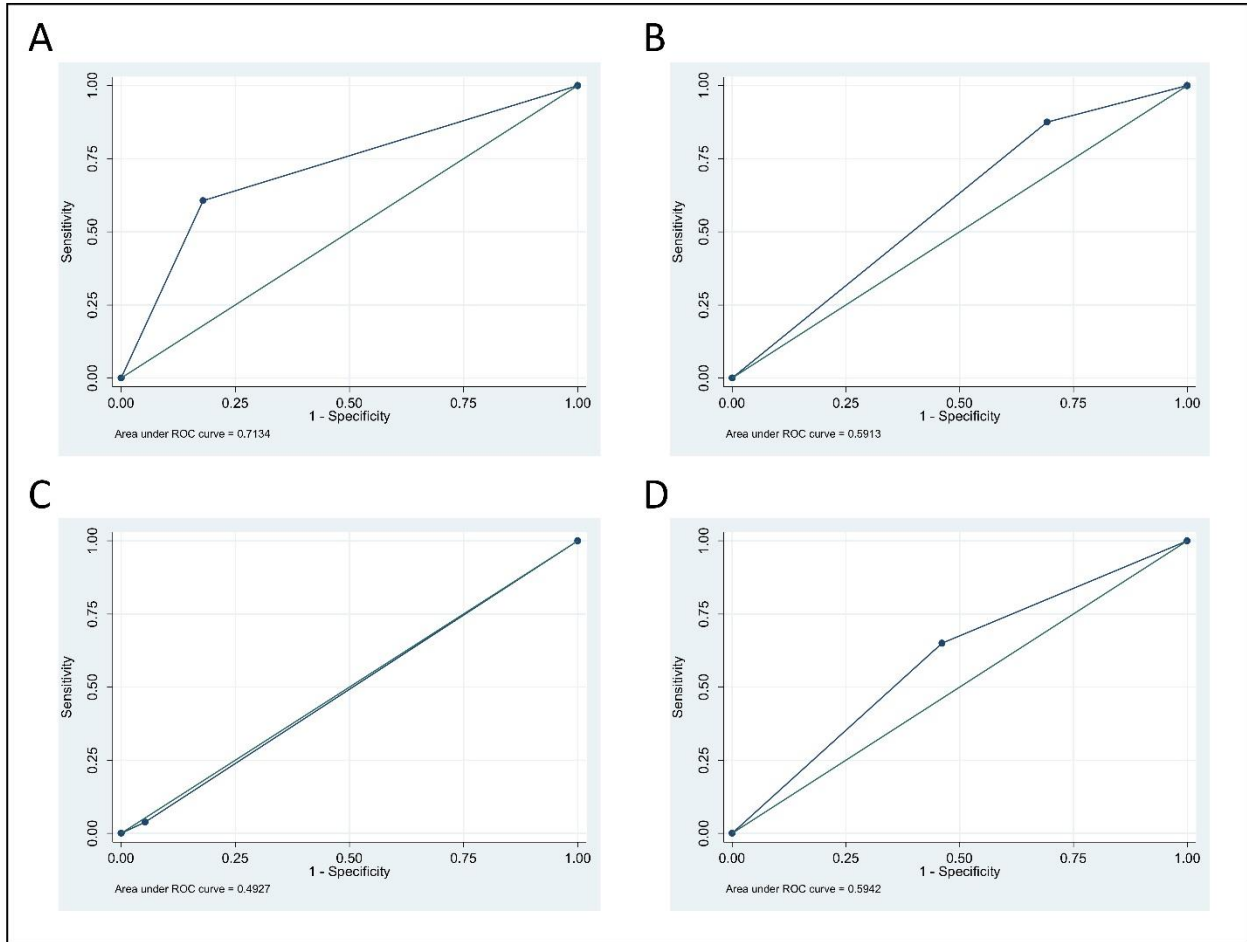

**Supplemental Figure 2.** ROC Analysis in All Subjects for Stenoses > 50%

- A.** Resting ABI < 0.90
- B.** Exercise ABI < 0.90
- C.** Exercise Ankle Pressure Decrease > 30mmHg
- D.** Exercise ABI > 20% Decrease

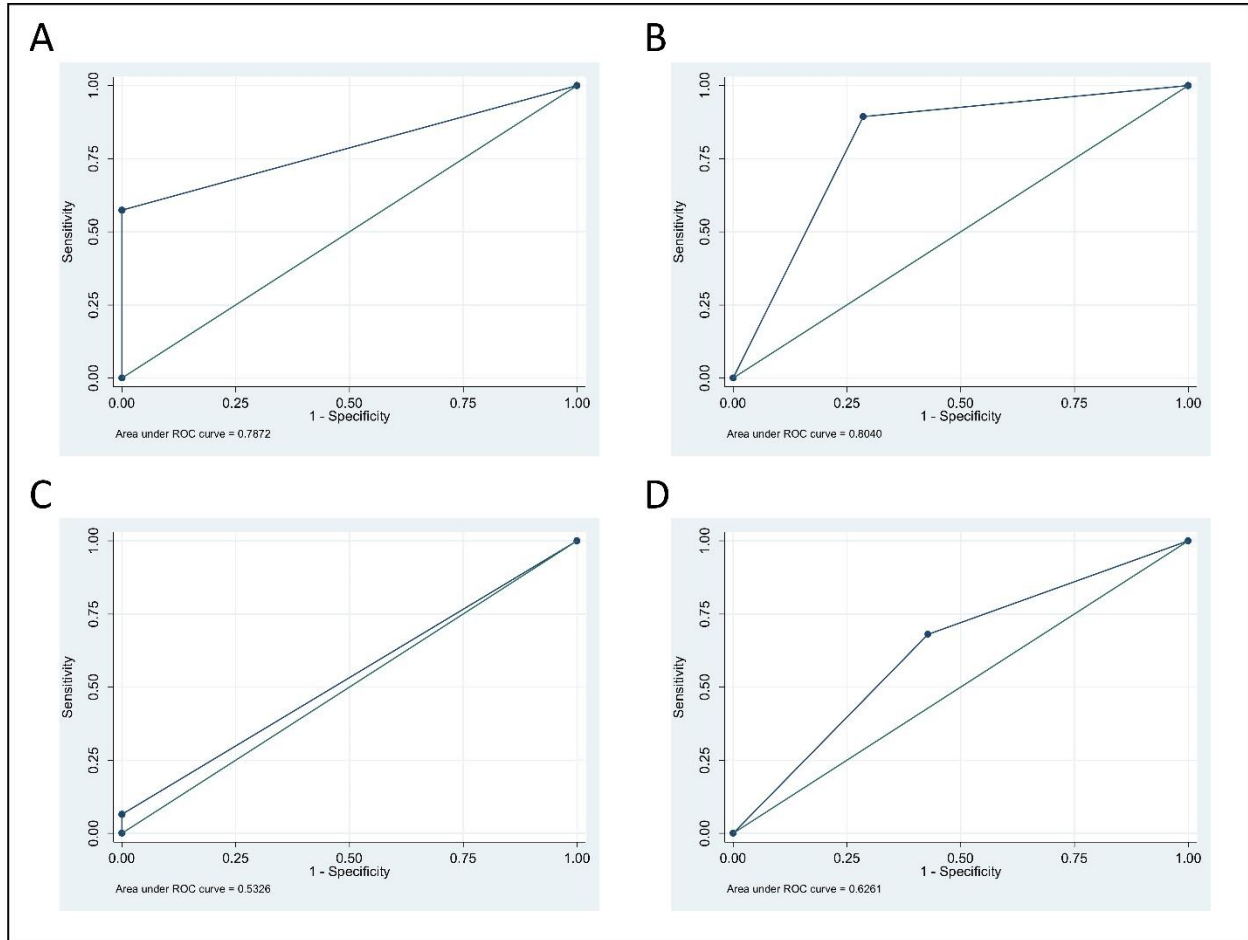

**Supplemental Figure 3.** ROC Analysis in Subjects with Diabetes for Stenoses > 75%

- A.** Resting ABI < 0.90
- B.** Exercise ABI < 0.90
- C.** Exercise Ankle Pressure Decrease > 30mmHg
- D.** Exercise ABI > 20% Decrease



**Supplemental Figure 4.** ROC Analysis in Subjects with Diabetes for Stenoses > 50%

- A.** Resting ABI < 0.90
- B.** Exercise ABI < 0.90
- C.** Exercise Ankle Pressure Decrease > 30mmHg
- D.** Exercise ABI > 20% Decrease

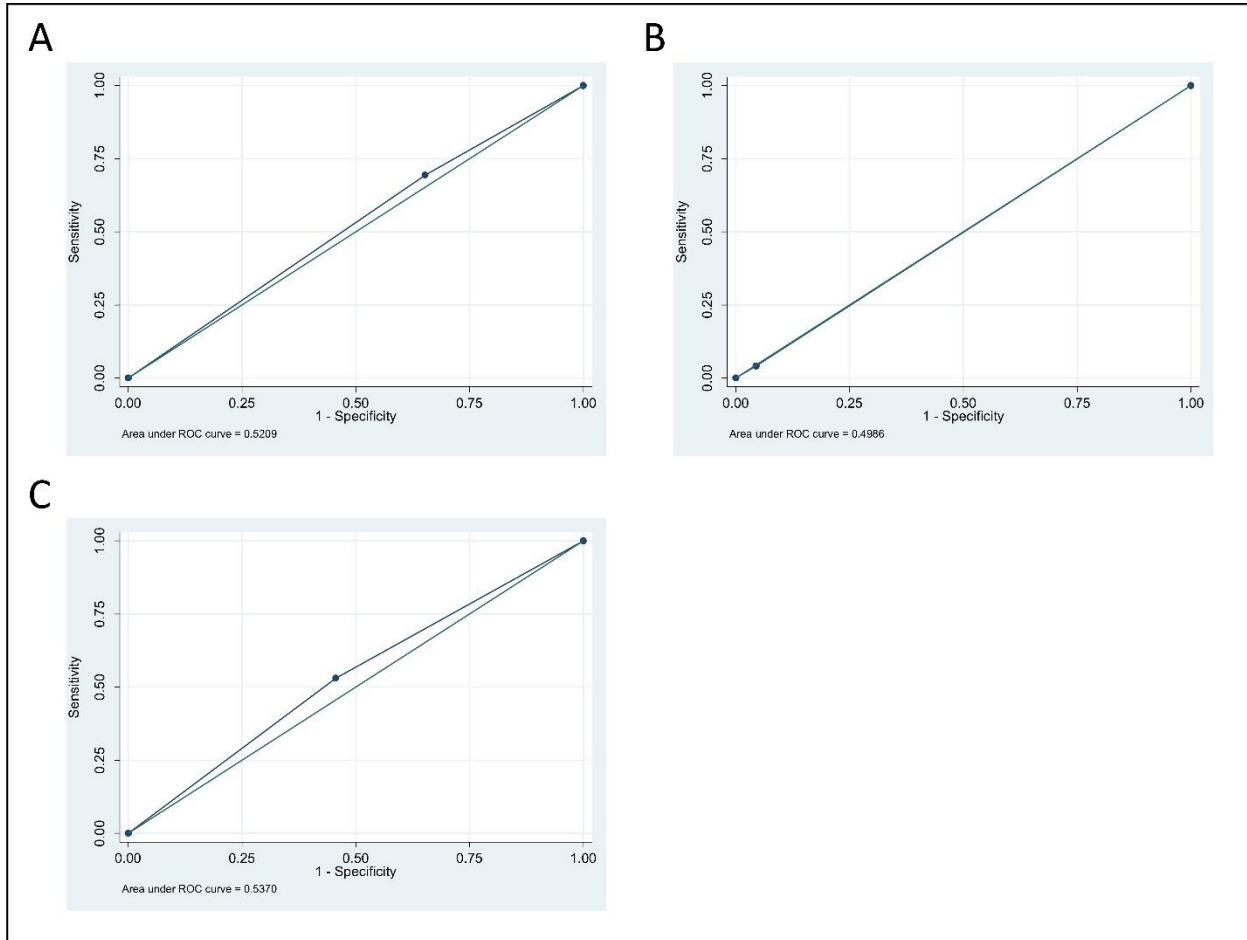

**Supplemental Figure 5.** ROC Analysis in Individuals with Normal Resting ABIs and Stenoses > 75%

- A.** Exercise ABI < 0.90
- B.** Exercise Ankle Pressure Decrease > 30mmHg
- C.** Exercise ABI > 20% Decrease

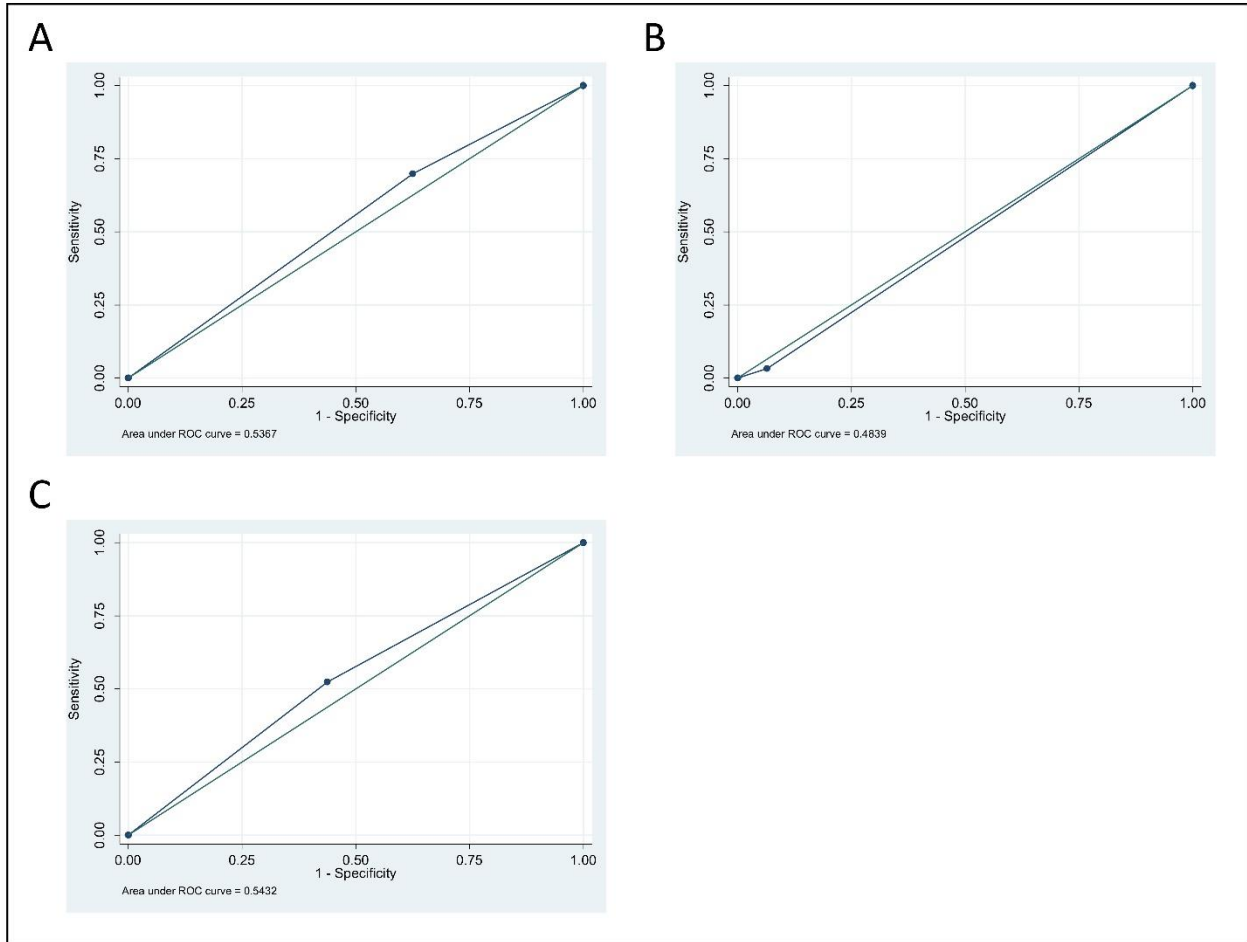

**Supplemental Figure 6.** ROC Analysis in Individuals with Normal Resting ABIs and Stenoses > 50%

**A.** Exercise ABI < 0.90

**B.** Exercise Ankle Pressure Decrease > 30mmHg

**C.** Exercise ABI > 20% Decrease
